# Supplementary material for: Molecular perspective on charge-tunable adsorption of volatile organic compounds on carbon nanotubes
Source: Royal Society of Chemistry journal article supplement (doi:10.1039/d0cp05729k), 2020-12-22
Supplement: d0cp05729k1.pdf [file d0cp05729k1.pdf]

## **Supporting Information**

### **Molecular perspective on charge-tunable adsorption of volatile organic compounds on carbon nanotubes**

Bin Li and Changwen Mi\*

Jiangsu Key Laboratory of Engineering Mechanics, School of Civil Engineering,  
Southeast University, Nanjing, Jiangsu 210096, China

E-mail address: [mi@seu.edu.cn](mailto:mi@seu.edu.cn) (Changwen Mi)

Table S1 Force field parameters describing the interactions between VOCs and the CNT.

| Atom name           | Atom type | $\sigma$ (nm) | $\epsilon$ (kJ/mol) | Atom name                         | Atom type | $\sigma$ (nm) | $\epsilon$ (kJ/mol) |
|---------------------|-----------|---------------|---------------------|-----------------------------------|-----------|---------------|---------------------|
| <b>CNT</b>          |           |               |                     | <b>Ether</b>                      |           |               |                     |
| C                   | CA        | 0.355         | 0.293               | C(CH <sub>3</sub> )               | CG331     | 0.365         | 0.326               |
| <b>Methanol</b>     |           |               |                     | H(CH <sub>3</sub> )               | HGA3      | 0.239         | 0.100               |
| C(CH <sub>3</sub> ) | CG331     | 0.365         | 0.326               | C(CH <sub>2</sub> )               | CG321     | 0.358         | 0.234               |
| H(CH <sub>3</sub> ) | HGA3      | 0.239         | 0.100               | H(CH <sub>2</sub> )               | HGA2      | 0.239         | 0.146               |
| O(O)                | OG311     | 0.314         | 0.804               | O(O)                              | OG301     | 0.294         | 0.428               |
| H(H)                | HGP1      | 0.04          | 0.192               | <b>Toluene</b>                    |           |               |                     |
| <b>Acetone</b>      |           |               |                     | C(C <sub>6</sub> H <sub>5</sub> ) | CG2R61    | 0.355         | 0.293               |
| C(CH <sub>3</sub> ) | CG331     | 0.365         | 0.326               | H(C <sub>6</sub> H <sub>5</sub> ) | HGR61     | 0.242         | 0.126               |
| H(CH <sub>3</sub> ) | HGA3      | 0.239         | 0.100               | C(CH <sub>3</sub> )               | CG331     | 0.365         | 0.326               |
| C(CO)               | CG2O5     | 0.356         | 0.377               | H(CH <sub>3</sub> )               | HGA3      | 0.239         | 0.100               |
| O(CO)               | OG2D3     | 0.303         | 0.209               |                                   |           |               |                     |
